# Supplementary material
Source: Research Square preprint supplement (doi:10.21203/rs.3.rs-9878203/v1)
Supplement: Supplementary file 1 [file e80a2384eb8b3fed3460d86e.docx]

Higher A Body Shape Index (ABSI) Is Associated With Lower Muscular Strength in Chinese Children and Adolescents

Xiaoli Tian

29 Nanwei Road, Xicheng District, Beijing, China

1345465854@qq.com

| Table S1.Comparison of handgripstrength indices in children and adolescents aged 7–17years（*t*/*F* test*,P* value） | | | | | |
| --- | --- | --- | --- | --- | --- |
| Variable | Group | n (%) | HGS | HGSB | HGSR |
| Sex | Boys | 3088 (50.38) | 24.8±12.1 | 1.28±0.55 | 0.51±0.15 |
| Girls | 3041 (49.62) | 18.4±6.8 | 0.96±0.30 | 0.42±0.10 |
| *P*-value | – | < 0.001 | < 0.001 | < 0.001 |
| Age groups | Group 1 | 1125 (18.36) | 10.3±3.0 | 0.64±0.18 | 0.38±0.10 |
| Group 2 | 1662 (27.12) | 17.2±5.8 | 0.96±0.30 | 0.44±0.12 |
| Group 3 | 1277 (20.84) | 24.3±8.0 | 1.26±0.40 | 0.49±0.13 |
| Group 4 | 2065 (33.69) | 29.8±9.5 | 1.43±0.46 | 0.52±0.14 |
| *P*-value | – | < 0.001 | < 0.001 | < 0.001 |
| region | North | 2772 (45.23) | 22.2±10.6 | 1.14±0.48 | 0.46±0.13 |
| South | 3357 (54.77) | 21.2±10.2 | 1.11±0.47 | 0.47±0.14 |
| *P*-value | – | < 0.001 | < 0.050 | < 0.001 |
| residence | Rural | 3243 (52.91) | 21.7±10.4 | 1.13±0.47 | 0.47±0.14 |
| Urban | 2886 (47.09) | 21.7±10.3 | 1.12±0.47 | 0.46±0.13 |
| *P*-value | – | 0.962 | 0.558 | < 0.001 |
| population_group | < 4people | 1967 (0.32) | 22.5±10.6 | 1.15±0.48 | 0.46±0.13 |
| ≥ 4people | 4162 (0.68) | 21.3±10.2 | 1.11±0.47 | 0.47±0.14 |
| *P*-value | – | < 0.001 | < 0.010 | 0.199 |
| Paternal_education_group | Elementary school and below | 821 (0.13) | 24.5±10.3 | 1.26±0.48 | 0.51±0.14 |
| Junior high school | 2578 (0.42) | 21.8±10.2 | 1.13±0.47 | 0.47±0.14 |
| High school(including vocational school) | 1323 (0.22) | 21.4±10.3 | 1.11±0.47 | 0.46±0.14 |
| Junior college | 640 (0.10) | 20.7±10.5 | 1.08±0.46 | 0.45±0.13 |
| Under graduate and above | 767 (0.13) | 19.2±10.2 | 0.99±0.44 | 0.42±0.12 |
| *P*-value | – | < 0.001 | < 0.001 | < 0.001 |
| Maternal_education_group | Elementary school and below | 1040 (0.17) | 24.7±10.4 | 1.27±0.49 | 0.51±0.14 |
| Junior high school | 2398 (0.39) | 21.8±10.1 | 1.13±0.46 | 0.47±0.14 |
| High school(including vocational school) | 1306 (0.21) | 21.7±10.3 | 1.12±0.46 | 0.46±0.13 |
| Junior college | 662 (0.11) | 19.6±10.5 | 1.03±0.47 | 0.44±0.13 |
| Under graduate and above | 723 (0.12) | 18.5±9.7 | 0.97±0.43 | 0.42±0.12 |
| *P*-value | – | < 0.001 | < 0.001 | < 0.001 |
| Paternal_Occupation_group | Professional and technical personnel | 1076 (0.18) | 20.8±10.4 | 1.08±0.47 | 0.45±0.13 |
| Heads of government agencies, party mass organizations, enterprise sand institutions | 526 (0.09) | 21.5±10.3 | 1.09±0.45 | 0.44±0.12 |
| Business and service industry personnel | 1408 (0.23) | 21.5±10.2 | 1.12±0.47 | 0.47±0.14 |
| Farmers and others | 2228 (0.36) | 22.2±10.4 | 1.15±0.47 | 0.48±0.14 |
| General staff of party and government agencies, enterprises and institutions | 172 (0.03) | 21.9±10.9 | 1.15±0.51 | 0.48±0.14 |
| Production and transportation equipment operators and related personnel(workers) | 482 (0.08) | 21.5±10.3 | 1.11±0.46 | 0.46±0.13 |
| Retired and unemployed personnel | 237 (0.04) | 21.5±11.1 | 1.12±0.49 | 0.48±0.14 |
| *P*-value | – | < 0.050 | < 0.010 | < 0.001 |
| Maternal_Occupation_group | Professional and technical personnel | 588 (0.10) | 20.2±10.3 | 1.05±0.47 | 0.44±0.13 |
| Heads of government agencies, party mass organizations ,enterprises and institutions | 346 (0.06) | 20.9±10.6 | 1.07±0.46 | 0.44±0.13 |
| Business and service industry personnel | 1597 (0.26) | 21.8±10.3 | 1.13±0.47 | 0.47±0.14 |
| Farmers and others | 1744 (0.28) | 22.5±10.5 | 1.16±0.48 | 0.48±0.14 |
| General staff of party and government agencies, enterprises and institutions | 284 (0.05) | 20.4±10.9 | 1.07±0.49 | 0.45±0.13 |
| Production and transportation equipment operators and related personnel(workers) | 268 (0.04) | 22.7±9.8 | 1.18±0.47 | 0.48±0.14 |
| Retired and unemployed personnel | 1302 (0.21) | 21.3±10.2 | 1.10±0.46 | 0.46±0.13 |
| *P*-value | – | < 0.001 | < 0.001 | < 0.001 |

| Table S1. Comparison of anthropometric indicators between different groups in children and adolescents aged 7–17 years（*t*/*F* test*,P* value） | | | | | | | |
| --- | --- | --- | --- | --- | --- | --- | --- |
| Variable | Group | n (%) | height | weight | BMI | WC | ABSI |
| population_group | < 4people | 1967 (0.32) | 154.4±16.1 | 47.4±15.0 | 19.3±3.3 | 65.2±9.5 | 0.073±0.0051 |
| ≥ 4people | 4162 (0.68) | 151.4±15.2 | 44.4±13.7 | 18.8±3.1 | 63.6±8.8 | 0.073±0.0051 |
| *P*-value | – | < 0.001 | < 0.001 | < 0.001 | < 0.001 | 0.121 |
| Paternal_education_group | Elementary school and below | 821 (0.13) | 154.9±13.6 | 47.0±12.4 | 19.2±2.9 | 64.8±8.08 | 0.073±0.0046 |
| Junior high school | 2578 (0.42) | 152.5±15.2 | 45.3±13.8 | 19.0±3.2 | 64.03±8.81 | 0.073±0.0051 |
| High school(including vocational school) | 1323 (0.22) | 152.41±15.73 | 45.4±14.4 | 19.0±3.3 | 64.3±9.37 | 0.073±0.0052 |
| Junior college | 640 (0.10) | 151.5±16.9 | 44.6±15.6 | 18.8±3.4 | 63.6±9.6 | 0.074±0.0054 |
| Under graduate and above | 767 (0.13) | 150.1±17.1 | 44.2±15.8 | 18.9±3.4 | 63.8±9.9 | 0.074±0.0054 |
| *P*-value | – | < 0.001 | < 0.010 | 0.113 | 0.065 | < 0.001 |
| Maternal_education_group | Elementary school and below | 1040 (0.17) | 155.3±13.8 | 47.4±12.4 | 19.3±3.0 | 65.0±8.2 | 0.073±0.0046 |
| Junior high school | 2398 (0.39) | 152.6±14.9 | 45.4±13.6 | 19.0±3.2 | 64.1±8.7 | 0.073±0.0051 |
| High school(including vocational school) | 1306 (0.21) | 153.1±15.8 | 46.2±14.8 | 19.2±3.3 | 64.6±9.6 | 0.073±0.0051 |
| Junior college | 662 (0.11) | 149.5±17.3 | 43.0±15.5 | 18.53±3.30 | 62.8±9.4 | 0.074±0.0055 |
| Under graduate and above | 723 (0.12) | 149.0±17.1 | 43.1±16.0 | 18.66±3.34 | 63.1±10.0 | 0.074±0.0056 |
| *P*-value | – | < 0.001 | < 0.001 | < 0.001 | < 0.001 | < 0.001 |
| Paternal_Occupation_group | Professional and technical personnel | 1076 (0.18) | 151.9±16.0 | 44.8±14.7 | 18.8±3.3 | 63.90±9.42 | 0.074±0.0053 |
| Heads of government agencies, party mass organizations, enterprise sand institutions | 526 (0.09) | 154.1±16.1 | 47.50±15.3 | 19.4±3.4 | 65.02±9.72 | 0.073±0.0053 |
| Business and service industry personnel | 1408 (0.23) | 152.1±15.8 | 45.2±14.3 | 19.0±3.2 | 64.3±9.0 | 0.074±0.0051 |
| Farmers and others | 2228 (0.36) | 152.8±14.9 | 45.5±13.5 | 19.0±3.1 | 63.9±8.7 | 0.073±0.0050 |
| General staff of party and government agencies, enterprises and institutions | 172 (0.03) | 151.2±16.7 | 44.3±14.5 | 18.8±3.2 | 64.0±9.0 | 0.074±0.0051 |
| Production and transportation equipment operators and related personnel(workers) | 482 (0.08) | 151.9±15.7 | 45.3±14.3 | 19.1±3.2 | 64.4±9.3 | 0.074±0.0049 |
| Retired and unemployed personnel | 237 (0.04) | 150.3±16.7 | 43.9±14.5 | 18.8±3.2 | 63.1±9.2 | 0.073±0.0053 |
| *P*-value | – | 0.094 | 0.017 | < 0.050 | 0.094 | 0.333 |
| Maternal_Occupation_group | Professional and technical personnel | 588 (0.10) | 150.9±16.4 | 44.1±14.7 | 18.7±3.2 | 63.6±9.3 | 0.074±0.0055 |
| Heads of government agencies, party mass organizations ,enterprises and institutions | 346 (0.06) | 152.4±17.0 | 45.8±15.6 | 19.1±3.4 | 64.3±9.9 | 0.073±0.0049 |
| Business and service industry personnel | 1597 (0.26) | 152.8±15.5 | 45.6±14.5 | 19.0±3.3 | 64.4±9.3 | 0.074±0.0052 |
| Farmers and others | 1744 (0.28) | 153.1±14.9 | 45.9±13.5 | 19.1±3.1 | 64.3±8.6 | 0.073±0.0049 |
| General staff of party and government agencies, enterprises and institutions | 284 (0.05) | 150.4±17.2 | 43.5±15.2 | 18.6±3.2 | 63.3±9.5 | 0.074±0.0054 |
| Production and transportation equipment operators and related personnel(workers) | 268 (0.04) | 153.7±14.1 | 46.1±12.7 | 19.1±3.1 | 64.6±8.5 | 0.073±0.0049 |
| Retired and unemployed personnel | 1302 (0.21) | 151.8±15.5 | 45.1±14.1 | 19.0±3.2 | 63.8±9.0 | 0.073±0.0052 |
| *P*-value | – | < 0.010 | < 0.050 | 0.078 | 0.128 | < 0.010 |
| *Anthropometric indicators: height (cm), weight (kg), WC (waist circumference, cm), BMI (body mass index, kg/m²), and ABSI (A Body Shape Index).* | | | | | | | |

| Table S2. Overall Pearson correlation coefficient matrix (r/p) between hand grip strength indicators and body shape indices (n = 6129) | | | | | | | | |
| --- | --- | --- | --- | --- | --- | --- | --- | --- |
| Indicator | HGS | HGSB | HGSR | height | weight | BMI | WC | ABSI |
| HGS | 1 | 0.940*** | 0.772*** | 0.808*** | 0.784*** | 0.524*** | 0.589*** | -0.255*** |
| HGSB |  | 1 | 0.897*** | 0.748*** | 0.581*** | 0.230*** | 0.363*** | -0.193*** |
| HGSR |  |  | 1 | 0.409*** | 0.249*** | -0.008 | 0.097*** | -0.094*** |
| height |  |  |  | 1 | 0.883*** | 0.535*** | 0.648*** | -0.297*** |
| weight |  |  |  |  | 1 | 0.855*** | 0.848*** | -0.319*** |
| BMI |  |  |  |  |  | 1 | 0.852*** | -0.282*** |
| WC |  |  |  |  |  |  | 1 | 0.160*** |
| ABSI |  |  |  |  |  |  |  | 1 |
| Notes: Values on the diagonal represent the correlation of each variable with itself (all equal to 1.000). ****P* < 0.001. Height: height (cm); weight: weight (kg); BMI: body mass index (kg/m²); WC: waist circumference (cm); HGS: absolute hand grip strength (kg); HGSB: hand grip strength-to-weight ratio (kg/kg); HGSR: hand grip strength-to-BMI ratio [kg/(kg/m²)]; ABSI: A Body Shape Index. | | | | | | | | |

| Table S3. Detailed results of multivariable linear regression analysis | | | | |
| --- | --- | --- | --- | --- |
| Variable | Model 1 | Model 2 | Model 3 | Model 4 |
| *β (95% CI) , Std β , P*-value | *β (95% CI) , Std β , P*-value | *β (95% CI) , Std β , P*-value | *β (95% CI) , Std β , P*-value |
| Sex (Girls vs. Boys) | -5.07 (-5.36, -4.79) , -0.489 , <0.001 | -5.08 (-5.36, -4.80) , -0.490 , <0.001 | -5.08 (-5.36, -4.80) , -0.489 , <0.001 | -5.31 (-5.62, -5.00) , -0.512 , <0.001 |
| Age (years) | 1.07 (0.98, 1.16) , 0.314 , <0.001 | 1.08 (0.99, 1.17) , 0.317 , <0.001 | 1.07 (0.99, 1.16) , 0.315 , <0.001 | 0.61 (0.43, 0.78) , 0.178 , <0.001 |
| Age group (vs. Younger) |  |  |  |  |
| Younger | — | — | — | Ref |
| Middle-younger | — | — | — | -0.94 (-1.59, -0.28) , -0.090 , 0.005 |
| Middle-older | — | — | — | 0.83 (-0.18, 1.84) , 0.080 , 0.107 |
| Older | — | — | — | 2.72 (1.32, 4.12) , 0.262 , <0.001 |
| Height (cm) | 0.30 (0.28, 0.32) , 0.451 , <0.001 | 0.30 (0.28, 0.32) , 0.450 , <0.001 | 0.30 (0.28, 0.32) , 0.452 , <0.001 | 0.32 (0.30, 0.34) , 0.483 , <0.001 |
| BMI (kg,m²) | 0.34 (0.28, 0.39) , 0.104 , <0.001 | 0.32 (0.27, 0.37) , 0.098 , <0.001 | 0.32 (0.27, 0.37) , 0.100 , <0.001 | 0.30 (0.25, 0.35) , 0.093 , <0.001 |
| ABSI_Z | — | -0.47 (-0.60, -0.33) , -0.045 , <0.001 | -0.76 (-0.95, -0.57) , -0.073 , <0.001 | -0.03 (-0.34, 0.28) , -0.003 , 0.846 |
| Interaction |  |  |  |  |
| ABSI_Z ×Sex (Girls vs. Boys) | — | — | 0.59 (0.32, 0.86) , 0.057 , <0.001 | — |
| ABSI_Z × Group 2 (reference: Group 1) | — | — | — | -0.22 (-0.62, 0.19) , -0.021 , 0.289 |
| ABSI_Z × Group 3 (reference: Group 1) | — | — | — | -0.49 (-0.92, -0.07) , -0.047 , 0.023 |
| ABSI_Z × Group 4 (reference: Group 1) | — | — | — | -0.81 (-1.20, -0.42) , -0.078 , <0.001 |
| Model fit |  |  |  |  |
| R² | 0.730 | 0.732 | 0.733 | 0.739 |
| AIC | 38057.34 | 38014.20 | 37997.90 | 37853.94 |
| ΔR² (vs. reference) | — | 0.0020 | 0.0008 | 0.0074 |
| F-test for ΔR² | — | 45.27*** | 18.30*** | 29.06*** |
| Model 1 was adjusted for age, sex, height, and BMI.  Model 2 additionally included ABSI_Z.  Model 3 further included the ABSI_Z × sex interaction term (reference: boys).  Model 4 further included the ABSI_Z × age group interaction term (reference: Group 1).  In interaction models, the coefficient for ABSI_Z represents the association within the reference subgroup.  ΔR² represents the increase in explained variance relative to the corresponding reference model (Model 2 vs Model 1; Models 3–4 vs Model 2).  Age group definition (boys/girls): Group 1: 7-9/7-8 years; Group 2: 10-12/9-11 years; Group 3: 13-14/12-13 years; Group 4: ≥15/≥14 years. Reference: Group 1.  ****P* < 0.001. | | | | |

| Table S4. Summary of diagnostic results for four regression models | | | | |
| --- | --- | --- | --- | --- |
| Diagnostic | Model 1 | Model 2 | Model 3 | Model 4 |
| Maximum VIF | 4.04 | 4.04 | 4.04 | 24.86 |
| Number of influential points (%) | 330 (5.38%) | 340 (5.55%) | 329 (5.37%) | 312 (5.09%) |
| Quadratic term test, *P*-value | - | 0.152 | - | - |
| RCS nonlinearity test, *P*-value | - | 0.617 | - | - |
| Note: Variance inflation factors were acceptable in Models 1–3. Elevated VIF values in Model 4 were expected because continuous age, categorical age group, and interaction terms were simultaneously included to account for residual within-group age variation.  No evidence of significant nonlinearity was observed based on quadratic term testing or restricted cubic spline analyses. | | | | |

| **Table S5. Sensitivity analysis after exclusion of influential observations** | | |
| --- | --- | --- |
| Indicator | Original model  (*n*=6129) | After excluding influential observations  (n=5663) |
| **Model 2** |  |  |
| ABSI_Z | -0.465 (<0.001) | -0.414 (<0.001) |
| R² | 0.732 | 0.792 |
| **Model 3** |  |  |
| ABSI_Z | -0.756 (<0.001) | -0.561 (<0.001) |
| ABSI_Z × Sex (Girls vs. Boys) | 0.589 (<0.001) | 0.282 (0.023) |
| R² | 0.733 | 0.792 |
| **Model 4** |  |  |
| ABSI_Z | -0.031 (0.846) | -0.079 (0.572) |
| ABSI_Z × Group 2 (reference: Group 1) | -0.217 (0.289) | -0.230 (0.203) |
| ABSI_Z × Group 3 (reference: Group 1) | -0.493 (0.023) | -0.357 (0.068) |
| ABSI_Z × Group 4 (reference: Group 1) | -0.809 (<0.001) | -0.612 (<0.001) |
| R² | 0.739 | 0.796 |
| Note:Values are presented as β coefficients with corresponding P values in parentheses. Influential observations were identified using Cook’s distance > 4/n. Overall effect directions and magnitudes remained broadly consistent after exclusion of influential observations, supporting the robustness of the primary findings.Age group definition (boys/girls): Group 1: 7-9/7-8 years; Group 2: 10-12/9-11 years; Group 3: 13-14/12-13 years; Group 4: ≥15/≥14 years. Reference: Group 1. | | |

| Table S6. Bootstrap assessment of coefficient stability | | | | | |
| --- | --- | --- | --- | --- | --- |
| Variable | Original β | Bootstrap mean β | Bootstrap_SE | 95%BCa CI | Directional consistency (%) |
| ****Model 2**** |  |  |  |  |  |
| ABSI_Z | -0.47 | -0.47 | 0.07 | (-0.61, -0.32) | 100.0 |
| ****Model 3**** |  |  |  |  |  |
| ABSI_Z | -0.76 | -0.76 | 0.11 | (-0.96, -0.51) | 100.0 |
| ABSI_Z × Sex (reference: Boys) | 0.59 | 0.59 | 0.14 | (0.31, 0.86) | 100.0 |
| ****Model 4**** |  |  |  |  |  |
| ABSI_Z | -0.03 | -0.03 | 0.12 | (-0.25, 0.20) | 61.1 |
| ABSI_Z × Group 2 (reference: Group 1) | -0.22 | -0.22 | 0.17 | (-0.56, 0.10) | 90.3 |
| ABSI_Z × Group 3 (reference: Group 1) | -0.49 | -0.5 | 0.19 | (-0.88, -0.13) | 99.6 |
| ABSI_Z × Group 4 (reference: Group 1) | -0.81 | -0.81 | 0.17 | (-1.15, -0.47) | 100.0 |
| Note:Bootstrap analyses were based on 1,000 resamples. BCa CI indicates bias-corrected and accelerated confidence interval. Directional consistency represents the proportion of bootstrap samples yielding regression coefficients in the same direction as the original estimate.Age group definition (boys/girls): Group 1: 7-9/7-8 years; Group 2: 10-12/9-11 years; Group 3: 13-14/12-13 years; Group 4: ≥15/≥14 years. Reference: Group 1. | | | | | |

| Table S7. Sensitivity analysis using alternative handgrip strength metrics | | | |
| --- | --- | --- | --- |
| Outcome | β for ABSI_Z | 95% CI | *P-*value |
| handgrip strength (HGS) | -0.4654 | (-0.6009, -0.3298) | < 0.001 |
| Body weight-adjusted handgrip strength (HGSB) | -0.0225 | (-0.0292, -0.0150) | < 0.001 |
| BMI-adjusted handgrip strength (HGSR) | -0.0083 | (-0.0110, -0.0056) | < 0.001 |
| Note: All models were adjusted for age, sex, and height. BMI was additionally adjusted in all models to account for potential residual confounding related to body size. | | | |

| Table S8. Multidimensional sensitivity analysis summary of the association between ABSI_Z and handgrip strength | | | |
| --- | --- | --- | --- |
| Validation dimension | HGS | HGSB | HGSR |
| Main model (OLS regression) | -0.4654 (-0.6009, -0.3298)*** | -0.0225 (-0.0292, -0.0157)*** | -0.0083 (-0.0110, -0.0056)*** |
| Robust standard errors (HC3) | -0.4654 (-0.6024, -0.3283) | -0.0225 (-0.0292, -0.0157) | -0.0083 (-0.0110, -0.0056) |
| Influence analysis (Cook's distance exclusion) | -0.4137 (-0.5353, -0.2922) | -0.0224 (-0.0285, -0.0163) | -0.0091 (-0.0116, -0.0066) |
| Bootstrap validation (BCa, 1000 resamples) | -0.4690 (-0.6076, -0.3188) | -0.0227 (-0.0296, -0.0152) | -0.0084 (-0.0111, -0.0054) |
| Sex interaction term (ABSI_Z × sex) | 0.5887 (0.3189, 0.8585) | 0.0236 (0.0102, 0.0369) | 0.0080 (0.0026, 0.0134) |
| Age interaction effect (model comparison) | ΔR² = 0.0074, *P* < 0.001 | ΔR² = 0.0041, *P* < 0.001 | ΔR² = 0.0052, *P* < 0.001 |
| Note: Robust standard errors (HC3) were used for variance estimation. Bootstrap confidence intervals (BCa, 1000 resamples) were used for internal validation and were not considered primary inferential results. P values are based on the main model.****P* < 0.001. | | | |
